# Supplementary material for: Utilization of a high-throughput shoot imaging system to examine the dynamic phenotypic responses of a C4 cereal crop plant to nitrogen and water deficiency over time
Source: PubMed Central journal article supplement (PMC4378625; doi:10.1093/jxb/eru526), 2015-02-19
Supplement: supp_eru526_jexbot136184_file001.pdf [file supp_eru526_jexbot136184_file001.pdf]

**Utilization of a high-throughput shoot imaging system to examine the dynamic phenotypic responses of a C4 cereal crop plant to nitrogen and water deficiency over time**

E.H. Neilson, A.E. Edwards, C.K. Blomstedt, B. Berger, B. Lindberg Møller, R.M. Gleadow

**SUPPLEMENTARY INFORMATION**

**SUPPLEMENTARY FIGURES**

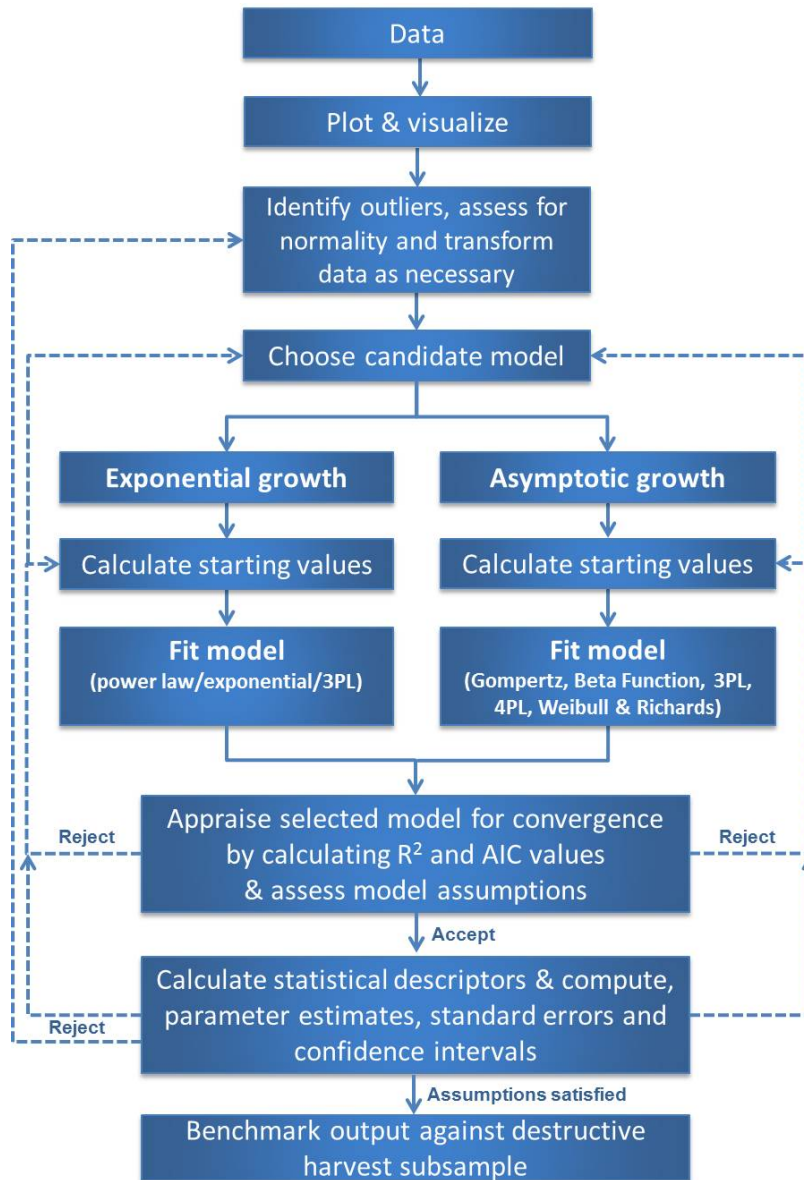

Adapted from Archontoulis and Miguez (2013)

**Supplementary Figure 1** Schematic overview for model selection and analysis (Abbreviations: 3PL, three parameter logistic; 4PL, four parameter logistic; AIC, Akaike information criterion). The models chosen for analysis are underlined.

**Archontoulis SV, Miguez FE.** 2013. Nonlinear Regression Models and Applications in Agricultural Research. *Agronomy Journal* **105**, 1-13. Reprinted by Permission, ASA, CSSA, SSSA.

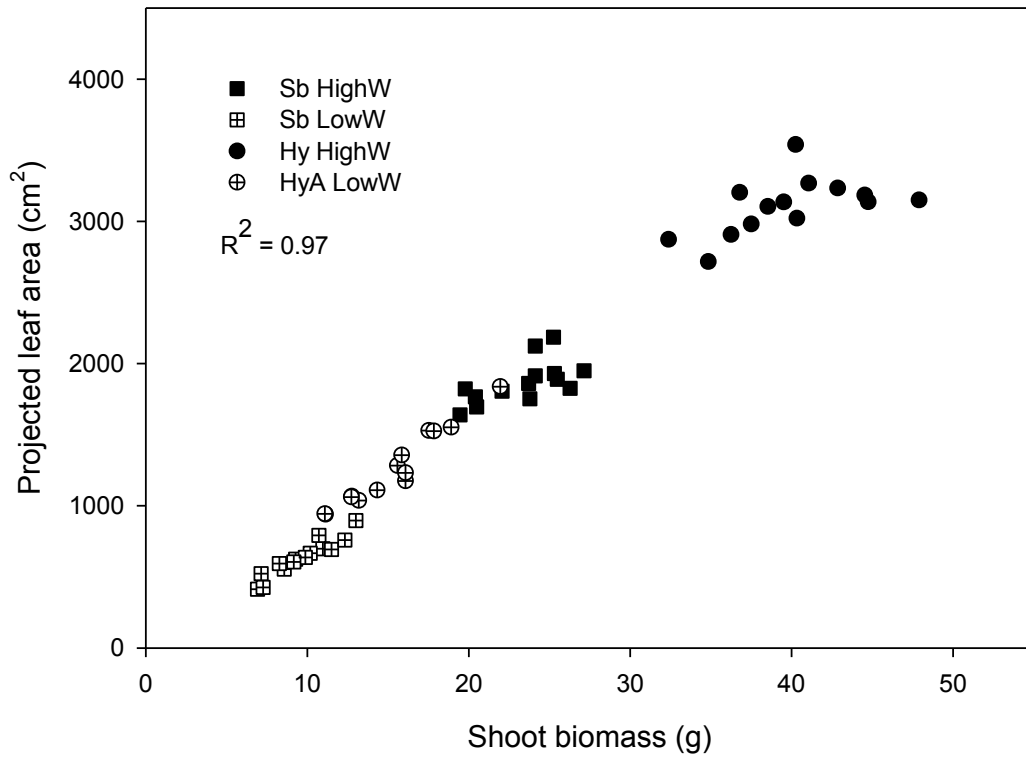

**Supplementary Figure 2** Relationship between shoot biomass and projected leaf area calculated from image analysis for Sb and HyA plants subject to high and low water conditions. Projected leaf area provides a strong indication of plant growth with a significant, positive correlation observed ( $P < 0.0001$ ;  $R^2 = 0.97$ ;  $y = 78.0x - 2.71$ ).

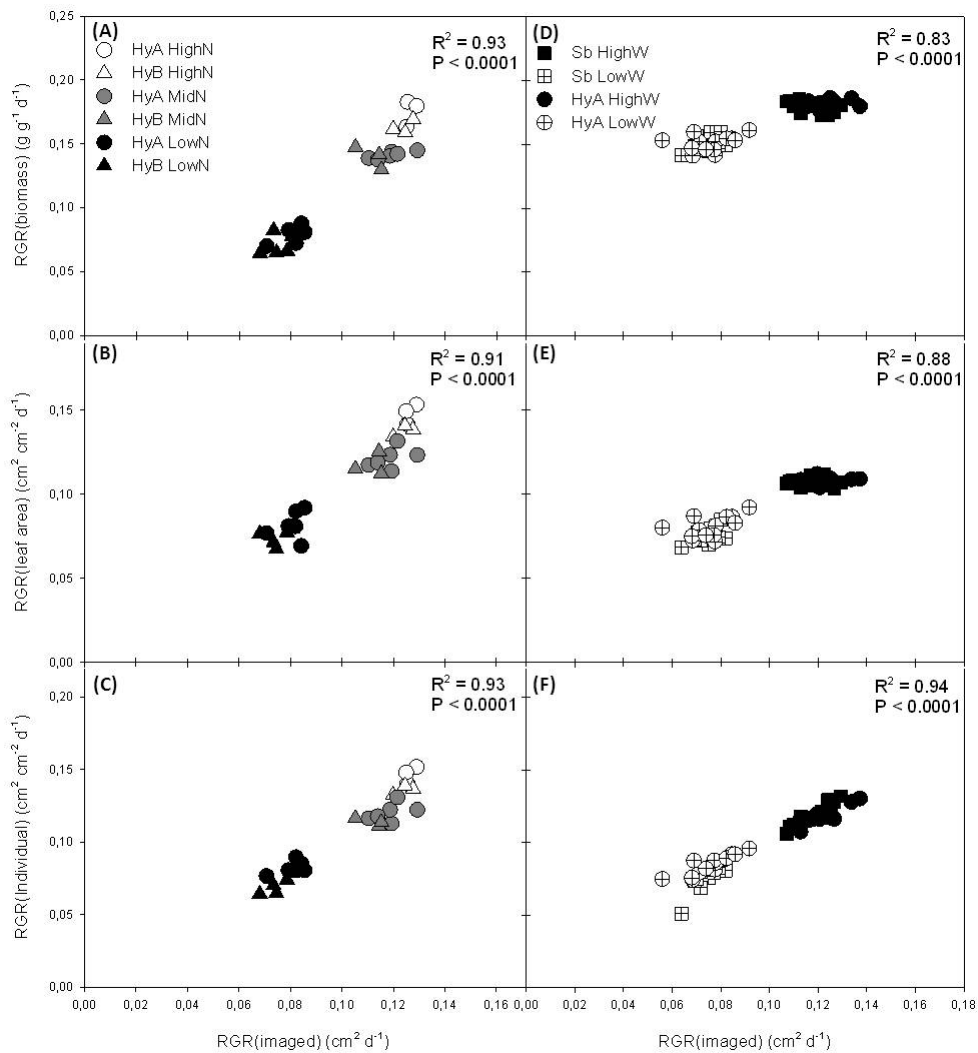

**Supplementary Figure 3** Assessment of Relative Growth Rate (RGR) derived from the power law and 3PL models selected for the nutrient (A-C) and water limiting experiments (D-F), respectively. RGR(imaged) was derived from the models using continuous data, compared to RGR(biomass) calculated from initial biomass of a sample of plants and final biomass of replicate plants (A and D); RGR(area) was calculated using the final leaf area of individual plants and the pooled mean initial leaf area (B and E); and RGR(individual) was where both the initial and final leaf area of individual plants were used to calculate the growth. A strong correlation was detected between RGR(biomass) and RGR(imaged) when plants grown under different nitrogen levels (A, B;  $R^2 = 0.93$  and  $0.91$ , respectively) but not when plants were grown under water-limited conditions (D, E;  $R^2 = 0.83$  and  $0.88$ , respectively). A very high correlation was detected in both nutrient and water limiting experiments when the initial leaf area for each individual plant was used to calculate RGR (C, D;  $R^2=0.93$  and  $94$ , respectively).

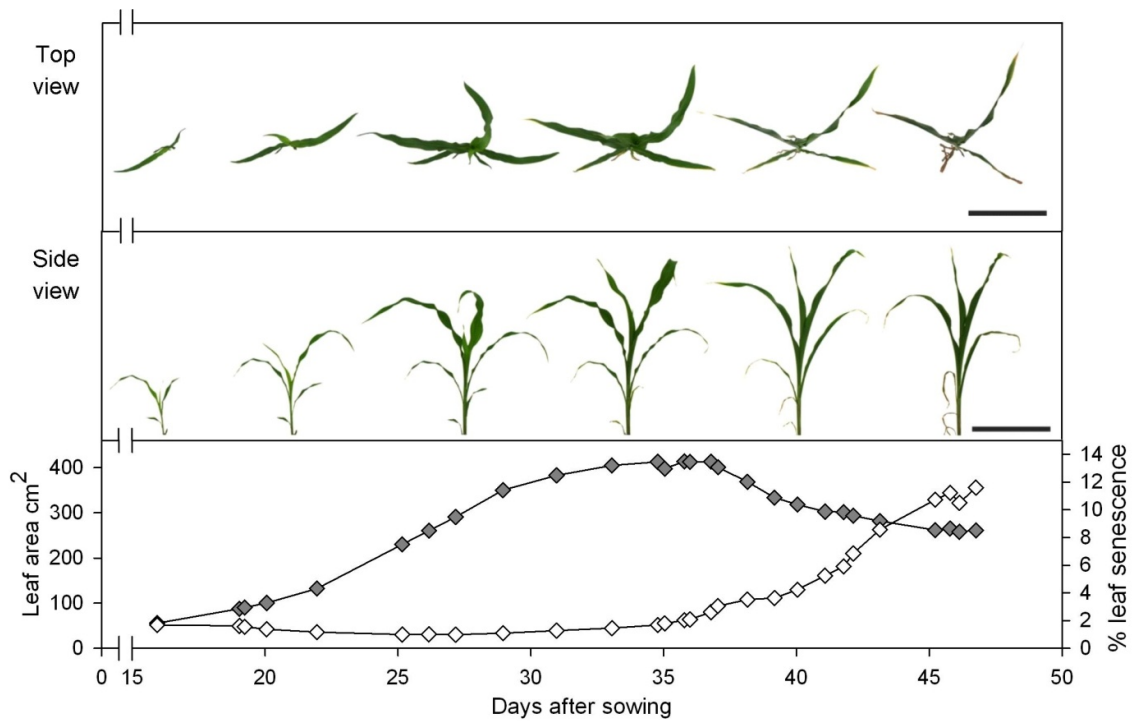

**Supplementary Figure 4.** Phenotypic response in a representative *Sorghum bicolor* (Sb) plant subjected to limited watering over four weeks as observed in images taken from above (A) and from the side (B). Leaf area (grey symbols, C) initially increased but then decreased as a result of leaf curling and senescence (white symbols).

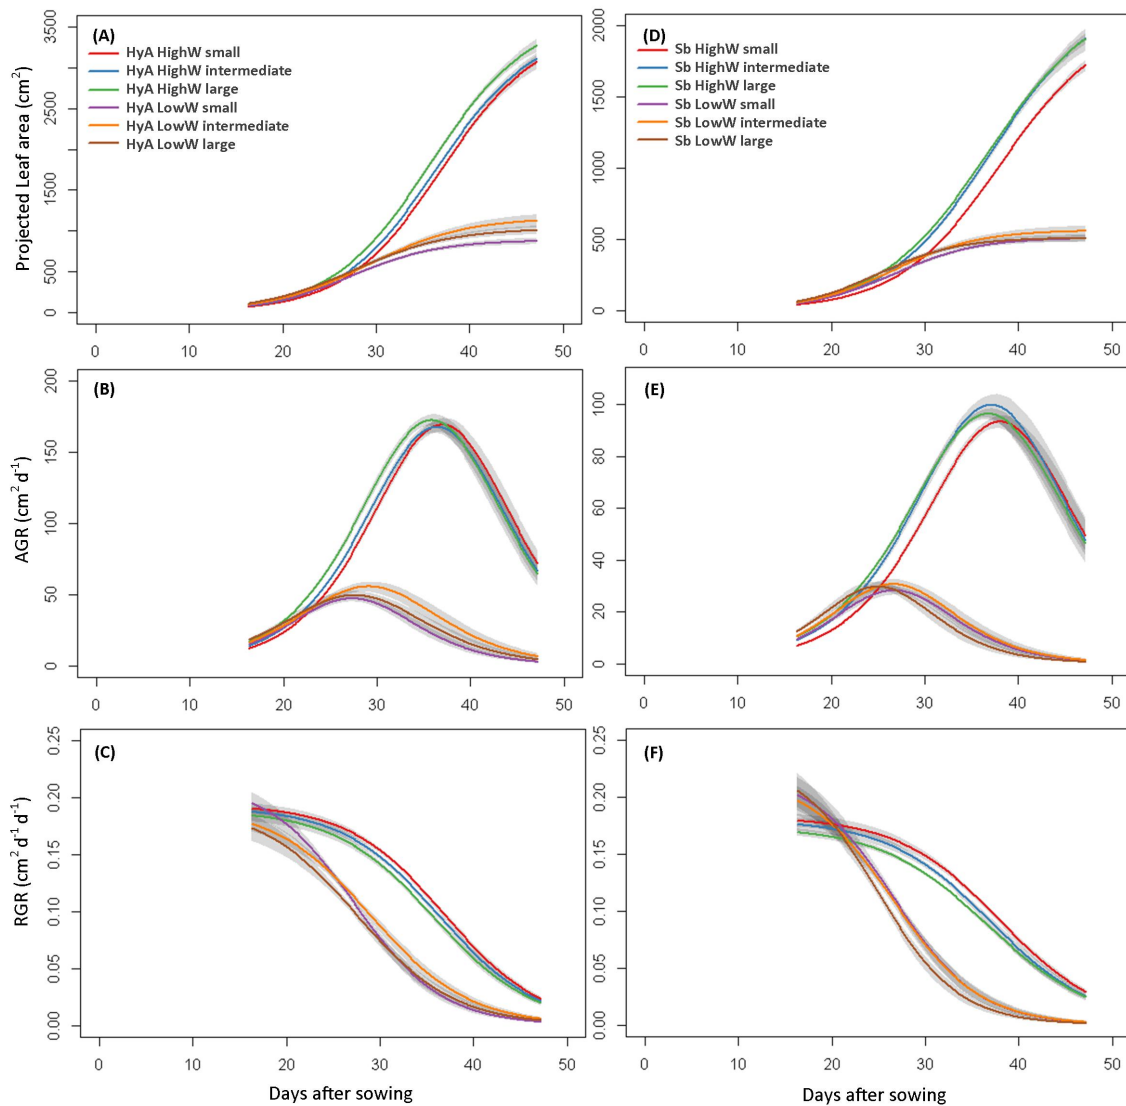

**Supplementary Figure 5:** Effect of seedling size (small, intermediate and large) on HyA (A-C) and Sb (D-F) growth under high and low watering regimes. Calculated projected leaf area (A, D), absolute growth rate (B, E) and relative growth rate (C, F) for the asymptotic 'water-limited' dataset fitted with the three parameter logistic model.

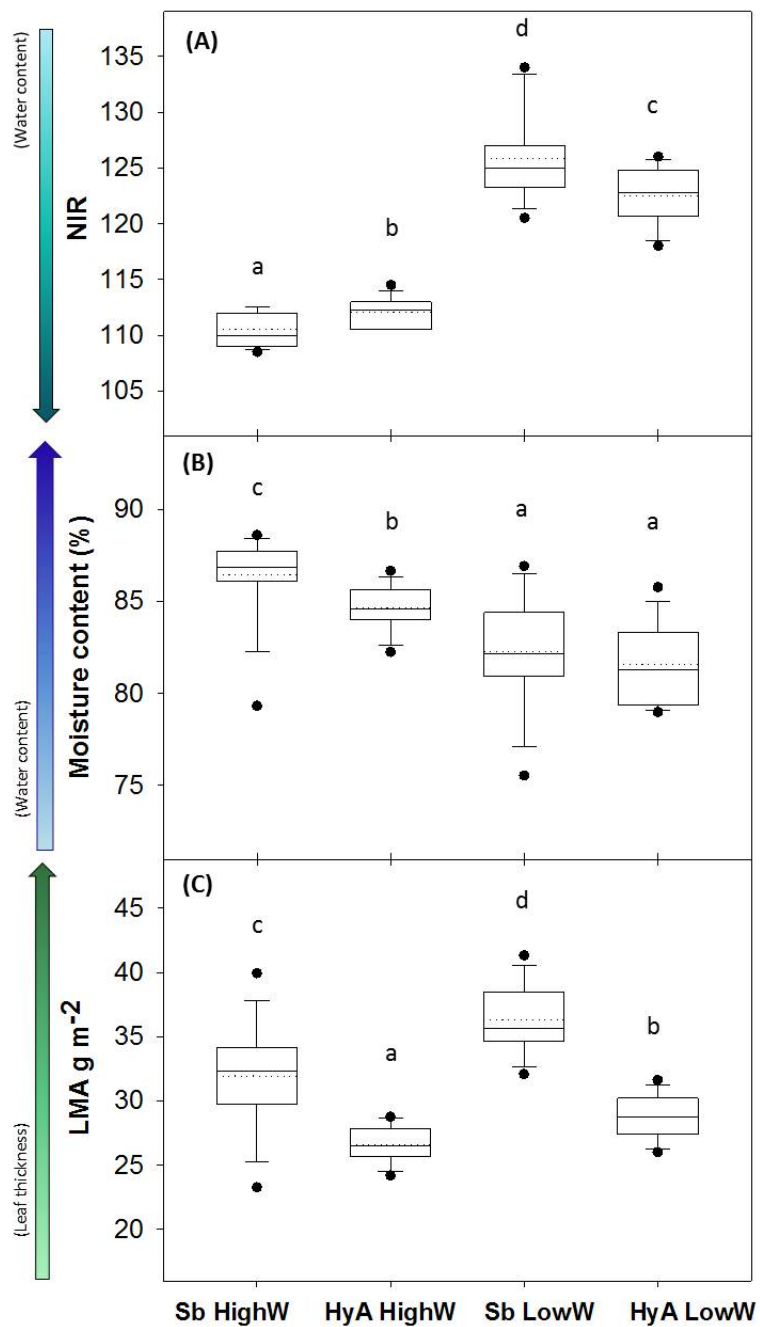

**Supplementary Figure 6:** Differences in NIR reflectance (A), moisture content (B) and LMA (leaf mass per area) (C) in Sb and HyA plants subjected to well watered and water limiting conditions. The significant differences in NIR (A) could not be accounted for by moisture content alone, as demonstrated by the similarity in moisture content observed between the two sorghum lines under low water conditions (B). However, a significant difference was observed, in LMA, which is used as a proxy for leaf thickness (C).

## SUPPEMENTARY TABLES

**Table S1**

Summary of the two experiments including cultivars and the dates of sowing and imaging. The first experiment was a nitrogen trial using two different forage sorghum hybrids (HyA and Sweet Jumbo -LPA). The second experiment was a water supply trial using one forage sorghum hybrid (HyA) and a variety of grain sorghum (*Sorghum bicolor*; Sb).

| Experiment             | Genotypes   | Date of sowing | Start imaging | End imaging |
|------------------------|-------------|----------------|---------------|-------------|
| Expt1: Nitrogen        | HyA and HyB | 22/2/11        | 3/3/11        | 4/4/11      |
| Expt 2: Water-limiting | HyA and Sb  | 23/12/11       | 8/1/12        | 8/2/12      |

**Table S2**

Summary of plant traits derived using LemnaGrid software using phenotypic imaging recorded in The Plant Accelerator®.

| <b>Trait</b>                        | <b>Description</b>                                                                                                                                                                                                                          |
|-------------------------------------|---------------------------------------------------------------------------------------------------------------------------------------------------------------------------------------------------------------------------------------------|
| NIR                                 | Near Infrared Reflectance. Images taken at 750-1400 nm, and used as a measure of water content.                                                                                                                                             |
| Senescence (%)                      | Measure of senescent (yellow) tissue using the relative proportion of pixels in the RGB images made using visible light.                                                                                                                    |
| Mean HUE angle                      | Measure of plant “greenness”, estimated by the conversion of RGB to HSI colour.                                                                                                                                                             |
| Compactness                         | Ratio of leaf area per convex hull area calculated from the top view image. Trait may be a proxy of leaf area index.                                                                                                                        |
| Convex Hull Area (cm <sup>2</sup> ) | The area within the smallest mathematically solved perimeter that envelopes the plant when imaged from above.                                                                                                                               |
| Eccentricity                        | Mathematical measure of how a conic section deviates from being circular from the top view image. This trait may be used as a proxy for plant symmetry, such that the closer the value is to 0, the more radially symmetrical the plant is. |
| Caliper Length (cm)                 | The longest line that can be drawn between the pixels within the convex hull from the top view image. This trait may be used as a measure of how wide and how far spread the leaves are.                                                    |
| Surface Coverage                    | Ratio of leaf area per smallest mathematically solved circle area enclosing the plant calculated from the top view image. Trait may be a proxy for leaf area index.                                                                         |



**Table S3 (A)**

Growth curve parameters for the modelled projected shoot area vs days after sowing for the nitrogen experiment with the calculated  $R^2$  values (See equation 2 and equation 3 in the Materials and Methods of the main text). Two varieties of forage sorghum (HyA and HyB) were grown at three different levels of nitrogen for 4 weeks and imaged daily.

| Model              | Parameter | HyA HighN        | HyA MidN         | HyA LowN         | HyB HighN       | HyB MidN         | HyB LowN         |
|--------------------|-----------|------------------|------------------|------------------|-----------------|------------------|------------------|
|                    |           |                  |                  |                  | No convergence  |                  |                  |
| <b>Exponential</b> | $M_0$     | $2.5 \pm 0.3$    | $2.2 \pm 0.1$    | $2.1 \pm 0.1$    |                 | $3.1 \pm 0.3$    | $2.5 \pm 0.3$    |
|                    | $r$       | $0.13 \pm 0.004$ | $0.12 \pm 0.002$ | $0.08 \pm 0.002$ |                 | $0.11 \pm 0.003$ | $0.07 \pm 0.003$ |
|                    | $R^2$     | 0.948            | 0.921            | 0.907            |                 | 0.932            | 0.847            |
|                    | AIC       | 541              | 895              | 583              |                 | 804              | 544              |
| <b>Power Law</b>   | $r$       | $0.21 \pm 0.01$  | $0.20 \pm 0.004$ | $0.15 \pm 0.01$  | $0.25 \pm 0.01$ | $0.22 \pm 0.01$  | $0.16 \pm 0.01$  |
|                    | beta      | $0.90 \pm 0.01$  | $0.88 \pm 0.01$  | $0.81 \pm 0.02$  | $0.87 \pm 0.01$ | $0.85 \pm 0.01$  | $0.75 \pm 0.03$  |
|                    | $R^2$     | 0.963            | 0.974            | 0.916            | 0.992           | 0.954            | 0.824            |
|                    | AIC       | 522              | 836              | 570              | 479             | 771              | 544              |
| <b>3-parameter</b> |           |                  |                  |                  |                 |                  |                  |
| <b>Logistic</b>    | Asym      | $1000 \pm 130$   | $620 \pm 30$     | $140 \pm 20$     | $1130 \pm 80$   | $600 \pm 70$     | $600 \pm 1500$   |
|                    | $t_{mid}$ | $40 \pm 1$       | $40 \pm 1$       | $43 \pm 3$       | $40 \pm 1$      | $40 \pm 2$       | $70 \pm 43$      |
|                    | $k$       | $5.6 \pm 0.2$    | $6.3 \pm 0.1$    | $9.2 \pm 0.6$    | $5.9 \pm 0.2$   | $6.6 \pm 0.3$    | $12.9 \pm 1.9$   |
|                    | $R^2$     | 0.948            | 0.985            | 0.916            | 0.985           | 0.951            | 0.843            |
|                    | AIC       | 511              | 786              | 571              | 463             | 763              | 546              |

**Table S3 (B)**

Growth curve parameters for the modelled projected shoot area vs days after sowing for the watering experiment with the calculated  $R^2$  values (See equation 2 and equation 3 in the Materials and Methods of the main text.). Two varieties of sorghum, a hybrid (HyA) and a variety of *Sorghum bicolor* (Sb) were grown for 4 weeks and either well-watered (High W) or watered to 25% of field capacity (Low W).

| Model                       | Parameter | Sb HighW      | Sb LowW       | HyA HighW     | HyA LowW      |
|-----------------------------|-----------|---------------|---------------|---------------|---------------|
| <b>3-parameter Logistic</b> | Asym      | 2160 ± 40     | 520 ± 90      | 3500 ± 50     | 1020 ± 20     |
|                             | $t_{mid}$ | 37.4 ± 0.3    | 25.9 ± 0.3    | 36.2 ± 0.2    | 28.1 ± 0.3    |
|                             | K         | 5.62 ± 0.08   | 4.38 ± 0.12   | 5.17 ± 0.06   | 5.08 ± 0.13   |
|                             | $R^2$     | 0.968         | 0.728         | 0.978         | 0.720         |
|                             | AIC       | 4592          | 4435          | 4881          | 4915          |
| <b>Gompertz</b>             | Asym      | 4500 ± 300    | 590 ± 20      | 6200 ± 300    | 1320 ± 60     |
|                             | k         | 12.0 ± 0.3    | 16.2 ± 1.3    | 14.3 ± 0.5    | 11.0 ± 0.6    |
|                             | r         | 0.945 ± 0.002 | 0.892 ± 0.004 | 0.936 ± 0.002 | 0.918 ± 0.003 |
|                             | $R^2$     | 0.965         | 0.729         | 0.970         | 0.759         |
|                             | AIC       | 4638          | 4477          | 5046          | 4887          |
| <b>Beta Function</b>        | $w_{max}$ | 1920 ± 50     | 492 ± 7       | No            | 1030 ± 20     |
|                             | $t_e$     | 49.7 ± 0.6    | 35.8 ± 0.5    | Convergence   | 43.8 ± 0.8    |
|                             | $t_m$     | 39.4 ± 0.4    | 27.8 ± 0.2    |               | 31.8 ± 0.4    |
|                             | $R^2$     | 0.967         | 0.716         |               | 0.748         |
|                             | AIC       | 4614          | 4467          |               | 4933          |
| <b>4-parameter Logistic</b> | $M_{min}$ | -7.1 ± 7.5    | No            | 23 ± 8        | No            |
|                             | $M_{max}$ | 2200 ± 60     | Convergence   | 3400 ± 60     | Convergence   |
|                             | $t_{mid}$ | 37.6 ± 0.4    |               | 35.9 ± 0.2    |               |
|                             | k         | 5.8 ± 0.2     |               | 4.9 ± 0.1     |               |
|                             | $R^2$     | 0.968         |               | 0.979         |               |
|                             | AIC       | 4592          |               | 4877          |               |
| <b>Richards</b>             | $M_{max}$ | 2260 ± 100    | No            | 3250 ± 70     | No            |
|                             | $t_{mid}$ | 37 ± 1        | Convergence   | 37.5 ± 0.3    | Convergence   |
|                             | k         | 6.3 ± 0.7     |               | 3.9 ± 0.3     |               |
|                             | $l_{pow}$ | -0.17 ± 0.18  |               | 0.4 ± 0.1     |               |
|                             | $R^2$     | 0.968         |               | 0.979         |               |
|                             | AIC       | 4592          |               | 4873          |               |
| <b>Weibull</b>              | $M_{max}$ | 2060 ± 60     | 57 ± 2        | 3170 ± 50     | No            |
|                             | drop      | 2030 ± 70     | -508 ± 17     | 3110 ± 50     | Convergence   |
|                             | lrc       | -18.2 ± 0.4   | 13.1 ± 0.7    | -20.4 ± 0.4   |               |
|                             | p         | 4.9 ± 0.1     | -4.1 ± 0.2    | 5.6 ± 0.1     |               |
|                             | $R^2$     | 0.968         | 0.731         | 0.979         |               |
|                             | AIC       | 4592          | 4413          | 4877          |               |

### Table S3 (C)

Equations for eight models used to assess the growth of sorghum in two sets of data obtained from The Plant Accelerator<sup>®</sup>. Growth models can be classified under two broad categories, those that assume no asymptotic final size exists (e.g. exponential growth) and those that do assume one exists (eg logistic curve). Non-Asymptotic growth models make the assumption that growth will continue indefinitely. Although this assumption may be unrealistic for plants through the entire lifetime of a plant, they may be appropriate for modelling the growth of young seedlings. The ability of each model to describe the data was assessed using convergence and correlative analysis (see Table S3A and S3B).

#### **Exponential**

The exponential model implies that the rate of change of a measured quantity is proportional to the measured quantity.

$$M(t) = M_0 e^{rt} \quad \text{Equation A.1}$$

$$AGR = \frac{dM}{dt} = M_0 r e^{rt} \quad \text{Equation A.2}$$

$$RGR = \frac{1}{M} \frac{dM}{dt} = r \quad \text{Equation A.3}$$

Where

M is the measured value

t is the time after sowing

$M_0$  is the initial measured value at time  $t_0$

r is a parameter controlling the relative growth rate.

#### **Power Law**

The power law model is a non-asymptotic model that allows both AGR and RGR to vary throughout time.  $0 > \beta > 1$  implies a progressive decrease in Relative growth rate. The linear model is obtained when  $\beta=0$  and the model converges to the exponential model as  $\beta$  approaches 1.

$$M(t) = \left( M_0^{1-\beta} + rt(1-\beta) \right)^{\frac{1}{1-\beta}} \quad \text{Equation B.1}$$

$$AGR = \frac{dM}{dt} = r \left( M_0^{1-\beta} + rt(1-\beta) \right)^{\frac{\beta}{1-\beta}} \quad \text{Equation B.2}$$

$$RGR = \frac{1}{M} \frac{dM}{dt} = \frac{r}{\left( M_0^{1-\beta} + rt(1-\beta) \right)} \quad \text{Equation B.3}$$

Where

M is the measured value

t is the time after sowing

$M_0$  is the initial measured value at time  $t_0$

r is a parameter controlling the growth rate.

$\beta$  controls the progressive changes to RGR.

### 3-parameter logistic

The 3-parameter logistic model is the most commonly used asymptotic model used to model growth. The lower asymptote of the 3 parameter version of the logistic curve is fixed at 0. Although this may not be strictly realistic as there is an inherit seed weight associated with a plant, this is generally small enough to be ignored for the purpose of curve fitting. In addition the inflection point of the curve (point at which the AGR is maximised) falls at half the expected upper asymptotic value. Other versions of the logistic curve can relax one or both of these constraints. The 3-parameter logistic function is implemented in R with the *SSlogistic* function in the nlme package.

$$M(t) = \frac{M_{max}}{1 + e^{\left(\frac{t_{mid}-t}{k}\right)}} \quad \text{Equation C.1}$$

$$AGR = \frac{dM}{dt} = \frac{M_{max} e^{\frac{t_{mid}+t}{k}}}{k \left( e^{\frac{t_{mid}}{k}} + e^{\frac{t}{k}} \right)^2} \quad \text{Equation C.2}$$

$$RGR = \frac{1}{M} \frac{dM}{dt} = \frac{e^{\frac{t_{mid}+t}{k}} \left( 1 + e^{\frac{t_{mid}-t}{k}} \right)}{k \left( e^{\frac{t_{mid}}{k}} + e^{\frac{t}{k}} \right)^2} \quad \text{Equation C.3}$$

Where

M is the measured value

t is the time after sowing

M<sub>max</sub> is the upper asymptote

t<sub>mid</sub> represents the inflection point of the model

k is a parameter controlling the maximal growth rate.

### Gompertz

The gompertz model allows RGR to fall exponentially over time. This differs from the logistic model in that the time of maximal growth appears at approximately 37% of the final expected biomass. Accordingly, the end result of the upper asymptote is approached more slowly than the lower asymptote. Like the 3 parameter logistic model, the gompertz model assumes an initial measured value of 0. The gompertz model is implemented in R with the *SSgompertz* function in the nlme package.

$$M(t) = Asym e^{-kr^t} \quad \text{Equation D.1}$$

$$AGR = \frac{dM}{dt} = k Asym r^t \left( -e^{-kr^t} \right) \log_e r \quad \text{Equation D.2}$$

$$RGR = \frac{1}{M} \frac{dM}{dt} = -kr^t \log_e r \quad \text{Equation D.3}$$

Where

M is the measured value

t is the time after sowing

Asym is the upper asymptote

k displaces the graph along the y axis

r controls the maximal growth rate

### Beta Function

The beta function is a 3 parameter sigmoidal function that allows flexibility in the time of maximal AGR. It does this using only 3 parameters allowing for easier convergence. However the model is not continuous (Yin *et al*, 2003).

$$M(t) = \begin{cases} 0, & t < 0 \\ M_{max} \left(1 + \frac{t_{end}-t}{t_{end}-t_{mid}}\right) \left(\frac{t}{t_{end}}\right)^{\frac{t_{end}}{t_{end}-t_{mid}}}, & 0 \leq t \leq t_{end} \\ M_{max}, & t > t_{end} \end{cases} \quad \text{Equation E.1}$$

$$AGR = \frac{dM}{dt} = \begin{cases} 0, & t < 0 \\ c_m \left(\frac{t_{end}-t}{t_{end}-t_{mid}}\right) \left(\frac{t}{t_{end}}\right)^{\frac{t_{mid}}{t_{end}-t_{mid}}}, & 0 \leq t \leq t_{end} \\ 0, & t > t_{end} \end{cases} \quad \text{Equation E.2}$$

Where

$$c_m = M_{max} \left(\frac{2t_{end}-t_{mid}}{t_{end}(t_{end}-t_{mid})}\right) \left(\frac{t_{mid}}{t_{end}}\right)^{\frac{t_{mid}}{t_{end}-t_{mid}}}$$

$$RGR = \frac{1}{M} \frac{dM}{dt} = \frac{(2t_{end}-t_{mid})(t_{end}-t)}{(t_{end}-t_{mid})(2t_{end}-t_{mid}-t)t} \quad \text{Equation E.3}$$

Where

M is the measured value

t is the time after sowing

M<sub>max</sub> is the maximal measured value

t<sub>end</sub> is the time that M<sub>max</sub> is achieved

t<sub>mid</sub> represents the inflection point of the model

### 4-paramater Logistic

The 4-parameter version of the logistic function relaxes the constraint on the lower asymptote, allowing non-zero values. The 3-parameter logistic model is obtained when M<sub>min</sub> equals 0. The four parameter logistic function is implemented in R with the *SSfpI* function in the nlme package.

$$M(t) = \frac{M_{min}(M_{max}-M_{min})}{1+e^{\left(\frac{t_{mid}-t}{k}\right)}} \quad \text{Equation F.1}$$

$$AGR = \frac{dM}{dt} = \frac{M_{min}(M_{max}-M_{min})e^{\frac{t_{mid}-t}{k}}}{k\left(e^{\frac{t_{mid}-t}{k}}+1\right)^2} \quad \text{Equation F.2}$$

$$RGR = \frac{1}{M} \frac{dM}{dt} = \frac{1}{k\left(e^{\frac{t-t_{mid}}{k}}+1\right)} \quad \text{Equation F.3}$$

Where

M is the measured value

t is the time after sowing

M<sub>min</sub> is the lower asymptote

M<sub>max</sub> is the upper asymptote

t<sub>mid</sub> represents the inflection point of the model

k is a parameter controlling the maximal growth rate.

### Weibull

$$M(t) = \frac{M_{max} - drop}{e^{e^r t^p}} \quad \text{Equation G.1}$$

$$AGR = \frac{dM}{dt} = p(drop - M)t^{p-1}e^{r - e^r t^p} \quad \text{Equation G.2}$$

$$RGR = \frac{1}{M} \frac{dM}{dt} = p(-e^r)t^{p-1} \quad \text{Equation G.3}$$

Where

M is the measured value

t is the time after sowing

$M_{max}$  is the upper asymptote

drop represents the change from  $M_{max}$  to the y intercept

r controls the maximal growth rate

p is a numerical constant representing the power to which x is raised

### Richards

The Richards curve is a 4 parameter version of the logistic function that relaxes the constraint on the location of maximal growth. The 3-parameter logistic model is obtained when p equals 0. The Richards function is implemented in R with the *SSRichards* function in the NRAIA package.

$$M(t) = \frac{M_{max}}{\left(1 + e^{\frac{t_{mid} - t}{k}}\right)^{e^{-p}}} \quad \text{Equation H.1}$$

$$AGR = M_{max} e^{-\frac{kp - t_{mid} - t}{k}} \left( e^{\frac{t_{mid} - t}{k}} + 1 \right)^{-e^{-p} - 1} \quad \text{Equation H.2}$$

M is the measured value

t is the time after sowing

$M_{min}$  is the lower asymptote

$M_{max}$  is the upper asymptote

$t_{mid}$  represents the inflection point of the model

k is a parameter controlling the maximal growth rate.

p controls the location of maximal growth.

#### Table S4

R scripts used to calculate the fitted growth models, absolute growth rates (AGR) and relative growth rates (RGR) along with the 95% confidence intervals for sorghum varieties used in the nitrogen and water-limiting experiments. Models are adapted from (Paine *et al.*, 2012). Text beginning with '#' contains comments explaining the function of the code following the statement, how to use the function and what it produces. The main driver of the script (output.growth.model) also shows a brief "how to use" with example data that is included in R.

```
# Summarizer function which takes the data set and an alpha value and
returns

# the high and low value for each data point within the confidence interval
specified

# in alpha (Adapted from Paine et al 2012)

#
# Example usage
# dataMatrix <- matrix(c(0,1,2,3,4,5,6,7,8,9,10))
# summarizer(list(growth=dataMatrix), 0.05)
#
# Expected Result:
# growth.lo  growth.hi
# 0.5        9.5

summarizer <- function(dat, alpha){
  n          <- length(dat)
  quantiles  <- c(alpha/2, 1-(alpha/2))
  CIs        <- data.frame(matrix(NA, ncol(dat[[1]]), n*2))
  names(CIs) <- paste(rep(names(dat), each = 2), c("lo", "hi"), sep = ".")

  for(i in 1:n){
    CIs[, (2*i-1):(2*i)] <- t(apply(dat[[i]], 2, quantile, quantiles, na.rm
= T))
  }

  return(CIs)
}
```

```

# General function to generate output data for models (Adapted from Paine
et al 2012)

# This cfunction can be used to produce values for the model provided, its
first
# derivative (Absolute growth rate) and the first derivative divided by the
model
# (Relative growth rate) and optionally the confidence intervals around the
model.

#

# The function takes any nls or gnls object (from the 'nlme' R package).
The function
# also requires the underlying model function to generate the first
derivative of the
# model. The function will also optionally calculate the confidence
intervals for the
# growth model, the AGR and the RGR with the provided alpha value. (Adapted
from Paine et al 2012)

#

# Parameters:

# fit: a nls or gnls fitted model (from the nlme package)
# times: a sequence of time points to calculate
# formula: an expression containing the formula for the model used to fit
the data
# indVar: string representation of the independent variable used in the
formula provided (defaults to 'x')
# CI: Boolean value determining whether or not to calculate the confidence
intervals (defaults to False)
# alpha: the alpha cut-off for confidence intervals (defaults to 0.05)

#

# Output:

# params: A list of the calculated parameters for the fitted model
# stats: A list containing the R^2, AIC and RMSE values
# data: The fitted and residuals calculated from the model
# rates: The M (model value), AGR, RGR and optionally the high and low
confidence intervals
#           for the M, AGR and RGR for each of the time points provided

```



```

# summary: Summary statistics including:
#           AvAGR: Average AGR
#           AvRGR: Average RGR
#           PeekTime: The time of maximal absolute growth rate
#           PeekAGR: The maximal absolute growth rate
#           PeekTime.hi: The high confidence interval for the time
of maximal absolute growth rate
#           PeekTime.lo: The low confidence interval for the time of
maximal absolute growth rate
#           PeekAGR.hi: The high confidence interval for maximal
absolute growth rate
#           PeekAGR.lo: The low confidence interval for maximal
absolute growth rate
#
# Example usage (fitting the R default ChickWeight dataset to the 3
parameter logistic model)
# library(nlme)
# logisticFit <- gnls(weight ~ SSlogis(Time, Asym, xmid, scal),
ChickWeight, weights=varPower())
# logisticFit <- gnls(weight ~ SSlogis(Time, Asym, xmid, scal),
ChickWeight, weights=varPower())
# formula      <- expression(Asym/(1+exp((xmid-x)/scal)))
# times        <- seq(1, 50,by = 0.1)
# model        <- output.growth.model(logisticFit, times, formula,
indVar='x', CI=T, alpha=0.05)
#
library(mvtnorm)
output.growth.model <- function(fit, times, formula, indVar='x', CI=F,
alpha=0.05){
  param <- coef(fit)

  #
  if(inherits(fit, "gnls")){
    fitted <- fit$fitted
    resid  <- fit$resid
  }else{ #Assume nls

```

```

    fitted <- fit$m$fitted()
    resid <- fit$m$resid()
  }

data <- data.frame(fitted = fitted, resid = resid)
mss <- sum((fitted - mean(fitted))^2)
rss <- sum(resid^2)
R2 <- mss/(mss + rss)
rmse <- sqrt(rss)
AIC <- AIC(fit)

assign(toString(indVar), times)
AGRFormula <- D(formula, toString(indVar))
rates = data.frame(
  times = times,
  M = eval(formula, as.list(param)),
  AGR = eval(AGRFormula, as.list(param))
)
rates$RGR = rates$AGR/rates$M

peekAGRm <- max(rates$AGR)
peekAGRt <- rates$times[which(rates$AGR==max(rates$AGR))]
avAGR <- mean(rates$AGR)
avRGR <- mean(rates$RGR)

if(CI == T){
  if(inherits(fit, "gnls")){
    cov <- fit$varBeta
  }else{
    cov <- summary(fit)$cov
  }
}
.x <- data.frame(rmvnorm(n=1000, mean=param, sigma=cov))
M <- AGR <- RGR <- matrix(NA, ncol = length(times), nrow = nrow(.x))
peakAGRt <- c()

```

```

peakAGRm <- c()
for(i in 1:nrow(.x)){
  M[i,]      <- eval(formula, as.list(.x[i,]))
  AGR[i, ]   <- eval(AGRFormula, as.list(.x[i,]))
  RGR[i,]    <- AGR[i,]/M[i,]

  peakAGRm[i] <- max(AGR[i, ])
  peakAGRt[i] <- rates$times[which(AGR[i, ]==max(AGR[i, ]))]
}

CIs <- summarizer(list(M = M, AGR = AGR, RGR = RGR), alpha)
rates = cbind(rates, CIs)

out <- list(params = param, stats = c(R2 = R2, AIC = AIC, RMSE = rmse),
            data = data, rates = rates,
            summary=c(AvAGR=avAGR, AvRGR=avRGR,
                    PeekTime=peekAGRt, PeekAGR=peekAGRm,
                    PeekTime.hi = quantile(peakAGRt, 1-alpha/2, na.rm =
= T)[1],
                    PeekTime.lo = quantile(peakAGRt, alpha/2, na.rm =
T)[1],
                    PeekAGR.hi = quantile(peakAGRm, 1-alpha/2, na.rm
= T)[1],
                    PeekAGR.lo = quantile(peakAGRm, alpha/2, na.rm =
T)[1]
            ))

}else{

  out <- list(params = param, stats = c(R2 = R2, AIC = AIC, RMSE = rmse),
            data = data, rates = rates,
            summary=c(AvAGR=avAGR, AvRGR=avRGR,
                    PeekTime=peekAGRt, PeekAGR=peekAGRm))
}
}

```

**Table S5:** Chlorophyll (Chl), HCN (dhurrin), nitrate (NO<sub>3</sub><sup>-</sup>) concentration, and total nitrogen allocation in the leaf tissue of two hybrid sorghum varieties grown under different nitrogen conditions. Mean ± standard error and significance of a two-way ANOVA are presented for each variety (V) and treatment (T).

|                                                 | Hybrid A   |            |            | Hybrid B   |           |            | Statistics |     |     |
|-------------------------------------------------|------------|------------|------------|------------|-----------|------------|------------|-----|-----|
|                                                 | High N     | Mid N      | Low N      | High N     | Mid N     | Low N      | V          | T   | V×T |
| Total N (%)                                     | 4.7 ± 0.1  | 2.0 ± 0.1  | 1.2 ± 0.03 | 4.7 ± 0.1  | 1.9 ± 0.1 | 1.2 ± 0.1  | ns         | *** | ns  |
| CN <sup>-</sup> mg g <sup>-1</sup>              | 0.5 ± 0.1  | 0.5 ± 0.03 | 0.1 ± 0.02 | 0.5 ± 0.04 | 0.4 ± 0.1 | 0.1 ± 0.03 | ns         | *** | ns  |
| NO <sub>3</sub> <sup>-</sup> mg g <sup>-1</sup> | 11.7 ± 0.5 | 4.8 ± 0.5  | 4.7 ± 0.6  | 10.7 ± 0.5 | 3.9 ± 0.3 | 4.4 ± 0.3  | ns         | *** | ns  |
| Chl mg g <sup>-1</sup>                          | 7.3 ± 0.3  | 6.9 ± 0.2  | 4.2 ± 0.2  | 7.7 ± 0.4  | 6.7 ± 0.2 | 5.0 ± 0.2  | ns         | *** | ns  |

\*P< 0.05; \*\*P< 0.01; \*\*\*P< 0.001; ns, not significant

**Table S6:** Chlorophyll (Chl), HCN (dhurrin) and nitrate (NO<sub>3</sub><sup>-</sup>) concentration, and total nitrogen allocation in the leaf tissue of well-watered and drought stressed *Sorghum bicolor* and forage sorghum HyA. Mean ± standard error and significance of a two-way ANOVA are presented for each variety (V) and treatment (T).

|                                                    | <i>S. bicolor</i> |            | HyA       |           | Two-way ANOVA |     |       |
|----------------------------------------------------|-------------------|------------|-----------|-----------|---------------|-----|-------|
|                                                    | WW                | WL         | WW        | WL        | V             | T   | V × T |
| Total N (%)                                        | 2.7 ± 0.1         | 3.6 ± 0.1  | 2.4 ± 0.1 | 3.1 ± 0.1 | ***           | *** | ns    |
| CN <sup>-</sup> (mg g <sup>-1</sup> )              | 0.3 ± 0.1         | 0.9 ± 0.1  | 0.5 ± 0.1 | 0.9 ± 0.1 | ns            | *** | ns    |
| NO <sub>3</sub> <sup>-</sup> (mg g <sup>-1</sup> ) | 6.6 ± 0.7         | 16.2 ± 1.5 | 2.5 ± 0.1 | 9.9 ± 0.3 | ***           | *** | ns    |
| Chl (mg g <sup>-1</sup> )                          | 8.4 ± 3.4         | 7.5 ± 3.1  | 7.2 ± 2.9 | 7.8 ± 3.2 | ns            | ns  | ns    |

WW – well watered; WL – water limited. \*P< 0.05; \*\*P< 0.01; \*\*\*P< 0.001; ns, not significant
